# Supplementary material
Source: HighWire-hosted journal article supplement (https://www.ajevonline.org/highwire/filestream/12900/field_highwire_adjunct_files/0/p1_22-019.pdf)
Supplement: p1_22-019.pdf [file p1_22-019.pdf]

**Supplemental Data for:**

Baumgartner K, Travadon R, Fujiyoshi PT, Mireles M and Moyer M. 2023. Preventing trunk diseases with fungicide applications to pruning wounds in Washington winegrapes. Am J Enol Vitic 74:7. DOI: 10.5344/ajev.2022.22019

**Supplemental Table 1** Identity of *Cytospora* isolates from water-inoculated (control) spurs in the Prosser, Washington vineyard, in comparison to related *Cytospora* previously reported from grape.

| Species                            | Isolate   | Origin                                                                                       | Amplification results for qPCR primers CBTF1 and CBTFR1 | Curated specimen identified from DNA sequence database BLASTn searches of ITS and TEF sequences | Internal Transcribed Spacer Region (ITS) |                                    |                | Elongation Factor (TEF) |                                    |            | Species reported as pathogenic on grape | Reference citing species' pathogenicity |                |                           |
|------------------------------------|-----------|----------------------------------------------------------------------------------------------|---------------------------------------------------------|-------------------------------------------------------------------------------------------------|------------------------------------------|------------------------------------|----------------|-------------------------|------------------------------------|------------|-----------------------------------------|-----------------------------------------|----------------|---------------------------|
|                                    |           |                                                                                              |                                                         |                                                                                                 | GenBank#                                 | BLASTn results of curated specimen |                | Gen-Bank#               | BLASTn results of curated specimen |            |                                         |                                         |                |                           |
|                                    |           |                                                                                              |                                                         |                                                                                                 |                                          | % Coverage                         | Number of gaps |                         | % Identity                         | % Coverage |                                         |                                         | Number of gaps | % Identity                |
| <i>Cytospora chrysosperma</i>      | AD        | Isolated from water-inoculated (control), water-treated spur in 2019                         | -                                                       | <i>C. chrysosperma</i> CFCC 89619                                                               | OM976605                                 | 100                                | 1              | 99.65                   | ON012572                           | 100        | 5                                       | 94.96                                   | Yes            | Arzanlou and Narmani 2015 |
| <i>Cytospora parakantschavelii</i> | AM        | Isolated from water-inoculated (control), water-treated spur in 2019                         | +                                                       | <i>C. parakantschavelii</i> MFLUCC 15-0857                                                      | OM976607                                 | 97                                 | 2              | 99.64                   | ON012574                           | 100        | 1                                       | 98.55                                   | Unknown        | NA                        |
| <i>Cytospora parasitica</i>        | WA215     | Isolated from water-inoculated (control), pyraclostrobin + fluxapyroxad-treated spur in 2020 | +                                                       | <i>C. parasitica</i> MFLUCC141055a                                                              | OM976611                                 | 100                                | 0              | 100                     | ON012578                           | 100        | 1                                       | 98.17                                   | Unknown        | NA                        |
| <i>C. parasitica</i>               | AG        | Isolated from water-inoculated (control), water-treated spur in 2019                         | +                                                       | <i>C. parasitica</i> MFLUCC141055a                                                              | OM976606                                 | 98                                 | 0              | 100                     | ON012573                           | 100        | 1                                       | 98.53                                   | Unknown        | NA                        |
| <i>C. parasitica</i>               | CF        | Isolated from water-inoculated (control), water-treated spur in 2019                         | +                                                       | <i>C. parasitica</i> MFLUCC141055a                                                              | OM976608                                 | 98                                 | 0              | 100                     | ON012575                           | 100        | 1                                       | 98.53                                   | Unknown        | NA                        |
| <i>C. parasitica</i>               | WA207     | Isolated from water-inoculated (control), water-treated spur in 2020                         | +                                                       | <i>C. parasitica</i> MFLUCC141055a                                                              | OM976609                                 | 100                                | 0              | 100                     | ON012576                           | 100        | 1                                       | 98.53                                   | Unknown        | NA                        |
| <i>Cytospora</i> species 1         | Bent902   | Isolated from previous survey of Washington vineyards                                        | -                                                       | <i>C. chrysosperma</i> CFCC 89619                                                               | OM976602                                 | 96                                 | 1              | 99.66                   | ON012569                           | 100        | 2                                       | 94.60                                   | Yes            | Travadon et al. 2022      |
| <i>Cytospora</i> species 1         | Bent903   | Isolated from previous survey of Washington vineyards                                        | +                                                       | <i>C. chrysosperma</i> CFCC 89619                                                               | OM976603                                 | 96                                 | 1              | 99.66                   | ON012570                           | 100        | 2                                       | 94.60                                   | Yes            | Travadon et al. 2022      |
| <i>Cytospora</i> species 2         | WA209     | Isolated from water-inoculated (control), water-treated spur in 2020                         | +                                                       | <i>C. ulmicola</i> MFLUCC 18-1227                                                               | OM976610                                 | 100                                | 1              | 99.33                   | ON012577                           | NA         | NA                                      | NA                                      | Unknown        | NA                        |
| <i>Cytospora ulmicola</i>          | WA310     | Isolated from water-inoculated (control), pyraclostrobin + fluxapyroxad-treated spur in 2021 | +                                                       | <i>C. ulmicola</i> MFLUCC 18-1227                                                               | OM976614                                 | 100                                | 0              | 99.82                   | ON012581                           | NA         | NA                                      | NA                                      | Unknown        | NA                        |
| <i>Cytospora vinacea</i>           | CBS141585 | Isolated from previous survey of New Hampshire vineyards                                     | +                                                       | <i>C. vinacea</i> Cyt5                                                                          | KX256256                                 | 100                                | 0              | 100                     | KX256277                           | 100        | 0                                       | 100                                     | Yes            | Lawrence et al. 2017      |
| <i>Cytospora viticola</i>          | Kern504   | Isolated from previous survey of California vineyards                                        | +                                                       | <i>C. viticola</i> Cyt6                                                                         | OM976604                                 | 72                                 | 0              | 99.76                   | ON012571                           | 90         | 0                                       | 98.02                                   | Yes            | Lawrence et al. 2017      |
| <i>C. viticola</i>                 | Bent401   | Isolated from previous survey of Washington vineyards                                        | +                                                       | <i>C. viticola</i> Cyt6                                                                         | OM976600                                 | 70                                 | 0              | 100                     | ON012567                           | 79         | 0                                       | 99.60                                   | Yes            | Lawrence et al. 2017      |
| <i>C. viticola</i>                 | Bent901   | Isolated from previous survey of Washington vineyards                                        | +                                                       | <i>C. viticola</i> Cyt6                                                                         | OM976601                                 | 73                                 | 0              | 99.76                   | ON012568                           | 79         | 1                                       | 98.03                                   | Yes            | Lawrence et al. 2017      |
| <i>C. viticola</i>                 | WA302     | Isolated from water-inoculated (control), thiophanate-methyl-treated spur in 2021            | +                                                       | <i>C. viticola</i> Cyt6                                                                         | OM976612                                 | 73                                 | 1              | 99.76                   | ON012579                           | 98         | 0                                       | 98.70                                   | Yes            | Lawrence et al. 2017      |
| <i>C. viticola</i>                 | WA305     | Isolated from water-inoculated (control), water-treated spur in 2021                         | +                                                       | <i>C. viticola</i> Cyt6                                                                         | OM976613                                 | 73                                 | 0              | 100                     | ON012580                           | 98         | 1                                       | 96.97                                   | Yes            | Lawrence et al. 2017      |
